# Supplementary material for: Sirt3 protects in vitro–fertilized mouse preimplantation embryos against oxidative stress–induced p53-mediated developmental arrest
Source: JCI journal article supplement (doi:10.1172/jci42020), 2010-07-19
Supplement: sd1 [file 1]

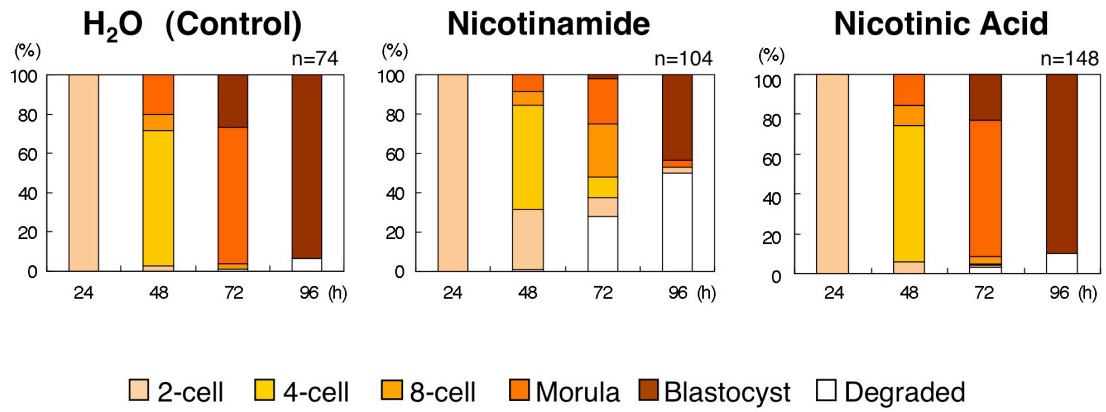

**Figure S1**

Effects of nicotinamide and nicotinic acid on development of in vitro fertilized and cultured embryos. Each column shows a breakdown of developmental stages at the indicated time after fertilization. Nicotinamide, but not nicotinic acid, caused developmental delay or arrest from the second cleavage.

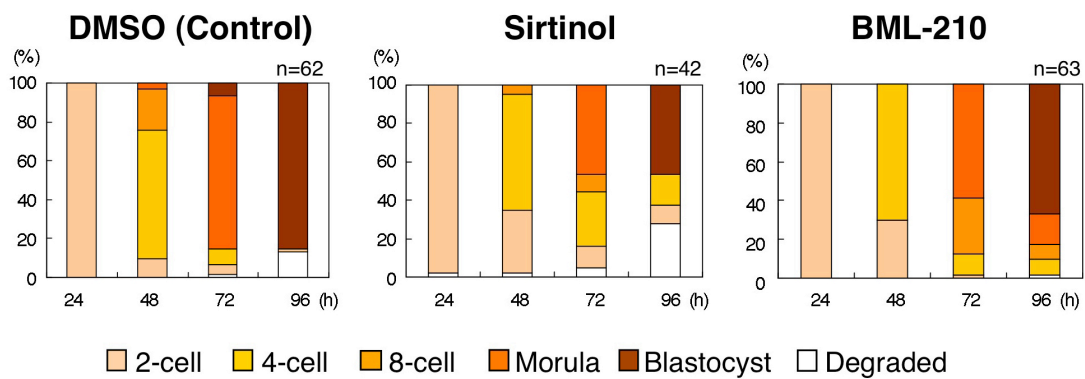

**Figure S2**

Effects of sirtinol and BML-210 on development of in vitro fertilized and cultured embryos. Each column shows a breakdown of developmental stages at the indicated time after fertilization. Both sirtuin inhibitors caused developmental delay or arrest from the second cleavage.

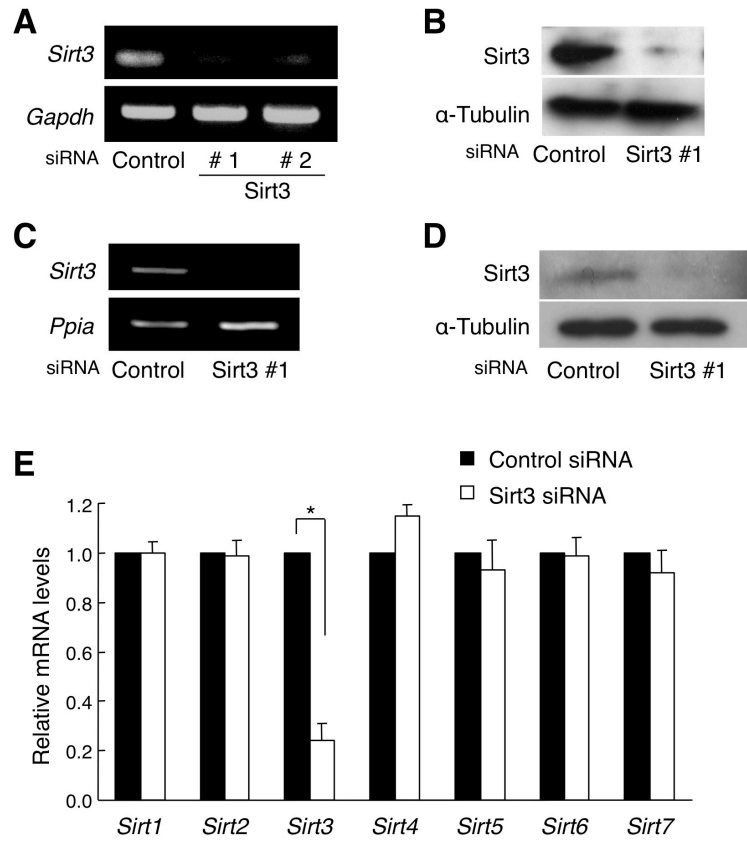

### Figure S3

RNAi-mediated Sirt3 knockdown. Stealth RNAs targeting two different regions of Sirt3 transcript (#1 and #2 for nucleotides 355 to 379 and 386 to 410, respectively) downregulated Sirt3 mRNA and protein levels. (A) NIH-3T3 cells were transfected with Sirt3-targeted or control siRNAs. 48 hours after transfection, the effects of siRNAs were evaluated by RT-PCR analysis for Sirt3 mRNA expression. (B) Western blotting analysis for Sirt3 protein in NIH 3T3 cells. The decrease of Sirt3 protein by siRNA#1 transfection was detected. Blotting for α-tubulin served as an internal control. (C) Pronuclear stage embryos were injected with Sirt3 or control siRNAs. The effects of siRNAs were evaluated at 8-cell stage by RT-PCR analysis for Sirt3 mRNA expression. (D) Western blotting analysis for Sirt3 protein in embryos. The decrease of Sirt3 protein by siRNA#1 transfection was detected at 8-cell stage. Blotting for α-tubulin served as an internal control. (E) Effects of Sirt3 knockdown on sirtuin gene expression. Real-time RT-PCR analysis was performed 24 h after siRNA injection. Sirt3 siRNA did not affect sirtuin gene expression except for *Sirt3* itself. Data are derived from 3 independent experiments. Statistical assessments were performed by applying Mann-Whitney U test. \*p<0.05.

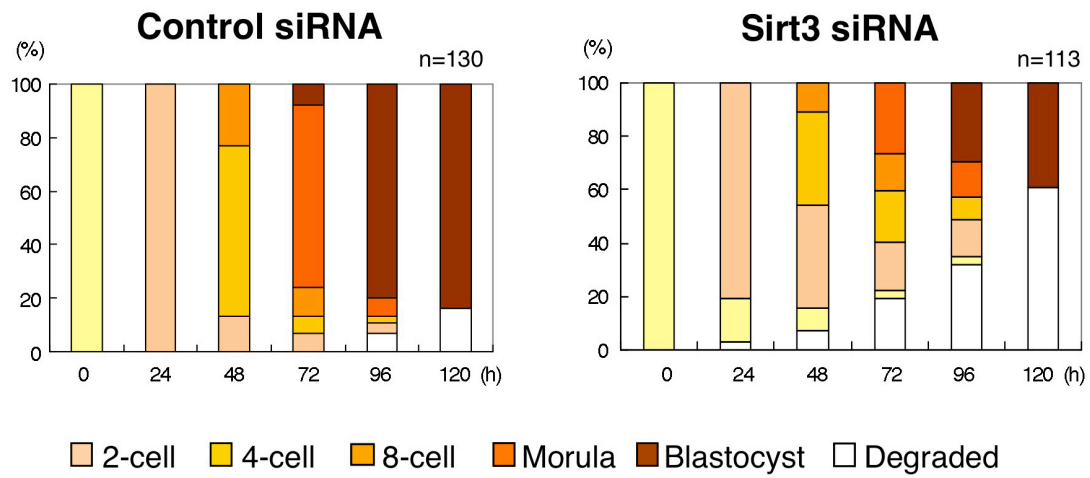

**Figure S4**

Effects of Sirt3 siRNA injection on development of in vitro fertilized and cultured embryos. Each column shows a breakdown of developmental stages at the indicated time after fertilization. siRNA-mediated Sirt3 knockdown caused developmental delay or arrest from the second cleavage.

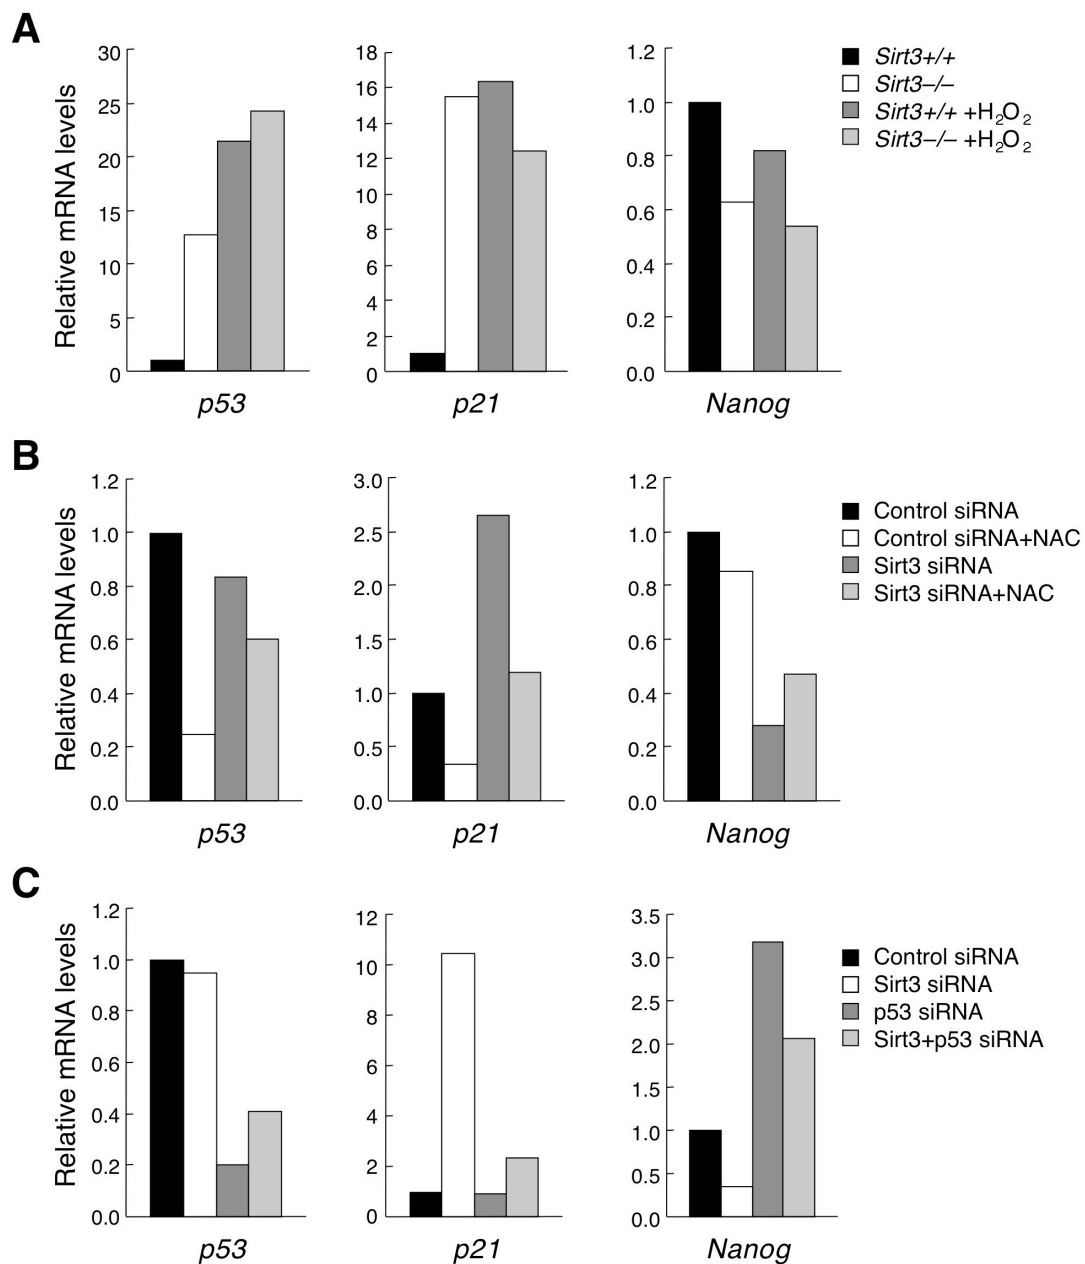

**Figure S5**

Quantification of *p53*, *p21* and *Nanog* mRNA levels in *Sirt3*-deficient preimplantation embryos in various conditions. (A) Effects of treatment with H<sub>2</sub>O<sub>2</sub> on *p53*, *p21* and *Nanog* expression in wild-type and *Sirt3*<sup>-/-</sup> embryos. (B) Effects of *Sirt3* knockdown and treatment with NAC *p53*, *p21* and *Nanog* expression. (C) Effects of *p53* knockdown on *Sirt3* siRNA-induced changes in *p21* and *Nanog* expression. Data are means of 2 to 4 independent experiments, examining more than 20 embryos for each experiment.

**Supplemental Table S1**

Primers and reaction conditions for conventional RT-PCR.

| Gene         | Primers |                                | Product size (bp) | Annealing (°C) |
|--------------|---------|--------------------------------|-------------------|----------------|
| <i>Sirt1</i> | forward | 5'-CCTTGGAGACTGCGATGTTA-3'     | 158               | 58             |
|              | reverse | 5'-GTGTTGGTGGCAACTCTGAT-3'     |                   |                |
| <i>Sirt2</i> | forward | 5'-GCAGTGTCAGAGCGTGGTAA-3'     | 170               | 60             |
|              | reverse | 5'-CTAGTGGTGCCTTGCTGATG-3'     |                   |                |
| <i>Sirt3</i> | forward | 5'-TACAGGCCCAATGTCACTCA-3'     | 168               | 63             |
|              | reverse | 5'-ACAGACCGTGCATGTAGCTG-3'     |                   |                |
| <i>Sirt4</i> | forward | 5'-CGCTGCTCAAGATCCCTAAG-3'     | 179               | 60             |
|              | reverse | 5'-GCGACACAGCTACTCCATCA-3'     |                   |                |
| <i>Sirt5</i> | forward | 5'-GACTCAAGACGCCAGAATCC-3'     | 179               | 60             |
|              | reverse | 5'-CAGAGGATGTTCCCACCACT-3'     |                   |                |
| <i>Sirt6</i> | forward | 5'-CTGGTCTGGAACACTGCT-3'       | 238               | 60             |
|              | reverse | 5'-CGGGTGTGATTGGTAGAGAG-3'     |                   |                |
| <i>Sirt7</i> | forward | 5'-GGCACTTGGTTGTCTACACG-3'     | 160               | 60             |
|              | reverse | 5'-GTGATGCTCATGTGGGTGAG-3'     |                   |                |
| <i>p53</i>   | forward | 5'-GACCGCCGTACAGAAGAAGA-3'     | 159               | 63             |
|              | reverse | 5'-GCGGATCTTGAGGGTCAAATA-3'    |                   |                |
| <i>p21</i>   | forward | 5'-GTACTTCCTCTGCCCTGCT-3'      | 171               | 60             |
|              | reverse | 5'-TGCGCTTGGAGTGATAGA-3'       |                   |                |
| <i>Nanog</i> | forward | 5'-AGGGTCTGCTACTGAGATGCT-3'    | 364               | 60             |
|              | reverse | 5'-CAACACCTGGTTTTTCTGCCACCG-3' |                   |                |
| <i>Ppia</i>  | forward | 5'-CGCGTCTCCTTCGAGCTGTTTG-3'   | 150               | 64             |
|              | reverse | 5'-TGTAAGTCACCACCCTGGCACAT-3'  |                   |                |
| <i>Gapdh</i> | forward | 5'-GGTGTGAACCACGAGAAATAT-3'    | 334               | 61             |
|              | reverse | 5'-AGATCCACGACGGACACATT-3'     |                   |                |

**Supplemental Table S2**

Primers and reaction conditions for real-time RT-PCR.

| Gene         | Primers |                             | Product size (bp) | Annealing (°C) |
|--------------|---------|-----------------------------|-------------------|----------------|
| <i>Sirt1</i> | forward | 5'-CCTTGGAGACTGCGATGTTA-3'  | 158               | 63             |
|              | reverse | 5'-GTGTTGGTGGCAACTCTGAT-3'  |                   |                |
| <i>Sirt2</i> | forward | 5'-GCAGTGTCAGAGCGTGGTAA-3'  | 170               | 63             |
|              | reverse | 5'-CTAGTGGTGCCTTGCTGATG-3'  |                   |                |
| <i>Sirt3</i> | forward | 5'-CTGACTTCGCTTTGGCAGAT-3'  | 206               | 63             |
|              | reverse | 5'-GTCCACCAGCCTTTCCACAC-3'  |                   |                |
| <i>Sirt4</i> | forward | 5'-CGCTGCTCAAGATCCCTAAG-3'  | 179               | 63             |
|              | reverse | 5'-GCGACACAGCTACTCCATCA-3'  |                   |                |
| <i>Sirt5</i> | forward | 5'-AGCCAGAGACTCAAGACGCCA-3' | 151               | 63             |
|              | reverse | 5'-AGGGCGAGCTCTCTGTCCACC-3' |                   |                |
| <i>Sirt6</i> | forward | 5'-TCGGGCCTGTAGAGGGGAGC-3'  | 174               | 63             |
|              | reverse | 5'-CGGCGCTTAGTGGCAAGGGG-3'  |                   |                |
| <i>Sirt7</i> | forward | 5'-GGCACTTGGTTGTCTACACG-3'  | 121               | 60             |
|              | reverse | 5'-AGGTTCGGCAGCACTCACAGG-3' |                   |                |
| <i>p53</i>   | forward | 5'-GACCGCCGTACAGAAGAAGA-3'  | 159               | 63             |
|              | reverse | 5'-GCGGATCTTGAGGGTCAAATA-3' |                   |                |
| <i>p21</i>   | forward | 5'-GTA CTTCCTCTGCCCTGCT-3'  | 171               | 60             |
|              | reverse | 5'-TGCGCTTGGAGTGATAGA-3'    |                   |                |
| <i>Nanog</i> | forward | 5'-GGAAGCAGAAGATGCGGACT-3'  | 177               | 60             |
|              | reverse | 5'-ACCGCTTGCCTTCATCCTT-3'   |                   |                |
| <i>Ppia</i>  | forward | 5'-CAGGTCCTGGCATCTTGTCC-3'  | 239               | 63             |
|              | reverse | 5'-ATGCCCGCAAGTCAAAGAA-3'   |                   |                |
